# Supplementary material
Source: Springer Nature journal article supplement (https://www.springermedizin.de/resource/supplementary/12916_2006_107_MOESM2_ESM.pdf/9599258)

# Rate (%)

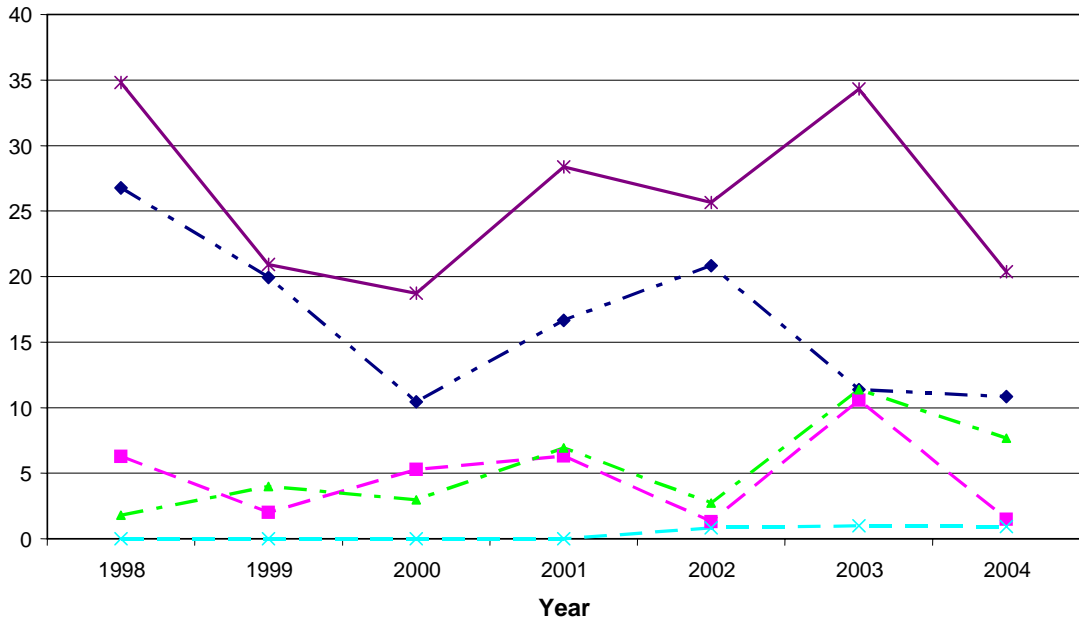

IFN1a - Avonex IFN1b - Betaseron GA IFN1a - Rebif Overall

Supplement: MOESM2 [file 9599258]
